# Supplementary material for: Inhibition of the MAP2K7-JNK pathway with 5Z-7-oxozeaenol induces apoptosis in T-cell acute lymphoblastic leukemia
Source: PubMed Central journal article supplement (PMC8416565; doi:10.18632/oncotarget.28040), 2021-08-31
Supplement: oncotarget-12-1787-s001.pdf [file oncotarget-12-1787-s001.pdf]

## Inhibition of the MAP2K7-JNK pathway with 5Z-7-oxozeaenol induces apoptosis in T-cell acute lymphoblastic leukemia

### SUPPLEMENTARY MATERIALS

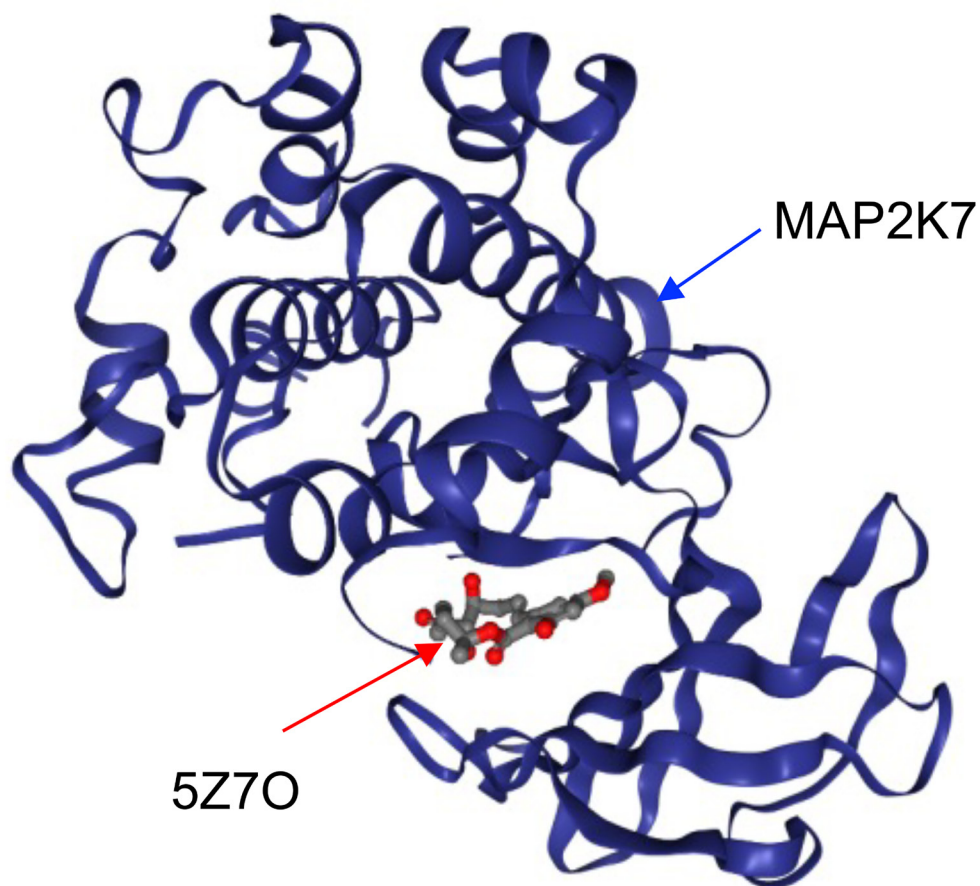

Supplementary Figure 1: 5Z-7-oxozeaenol (5Z7O in red) binding location in the ATP binding pocket of MAP2K7 (in blue).

### KOPTK1

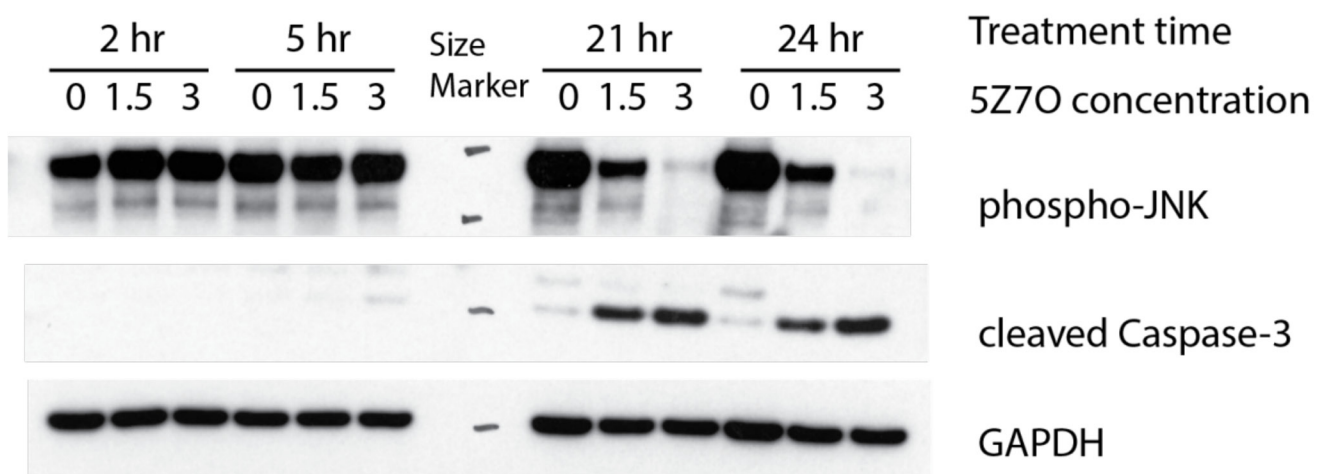

Supplementary Figure 2: Inhibition of phospho-JNK and increased caspase-3 cleavage over 24-hour treatment with 1.5 and 3  $\mu$ M 5Z7O.

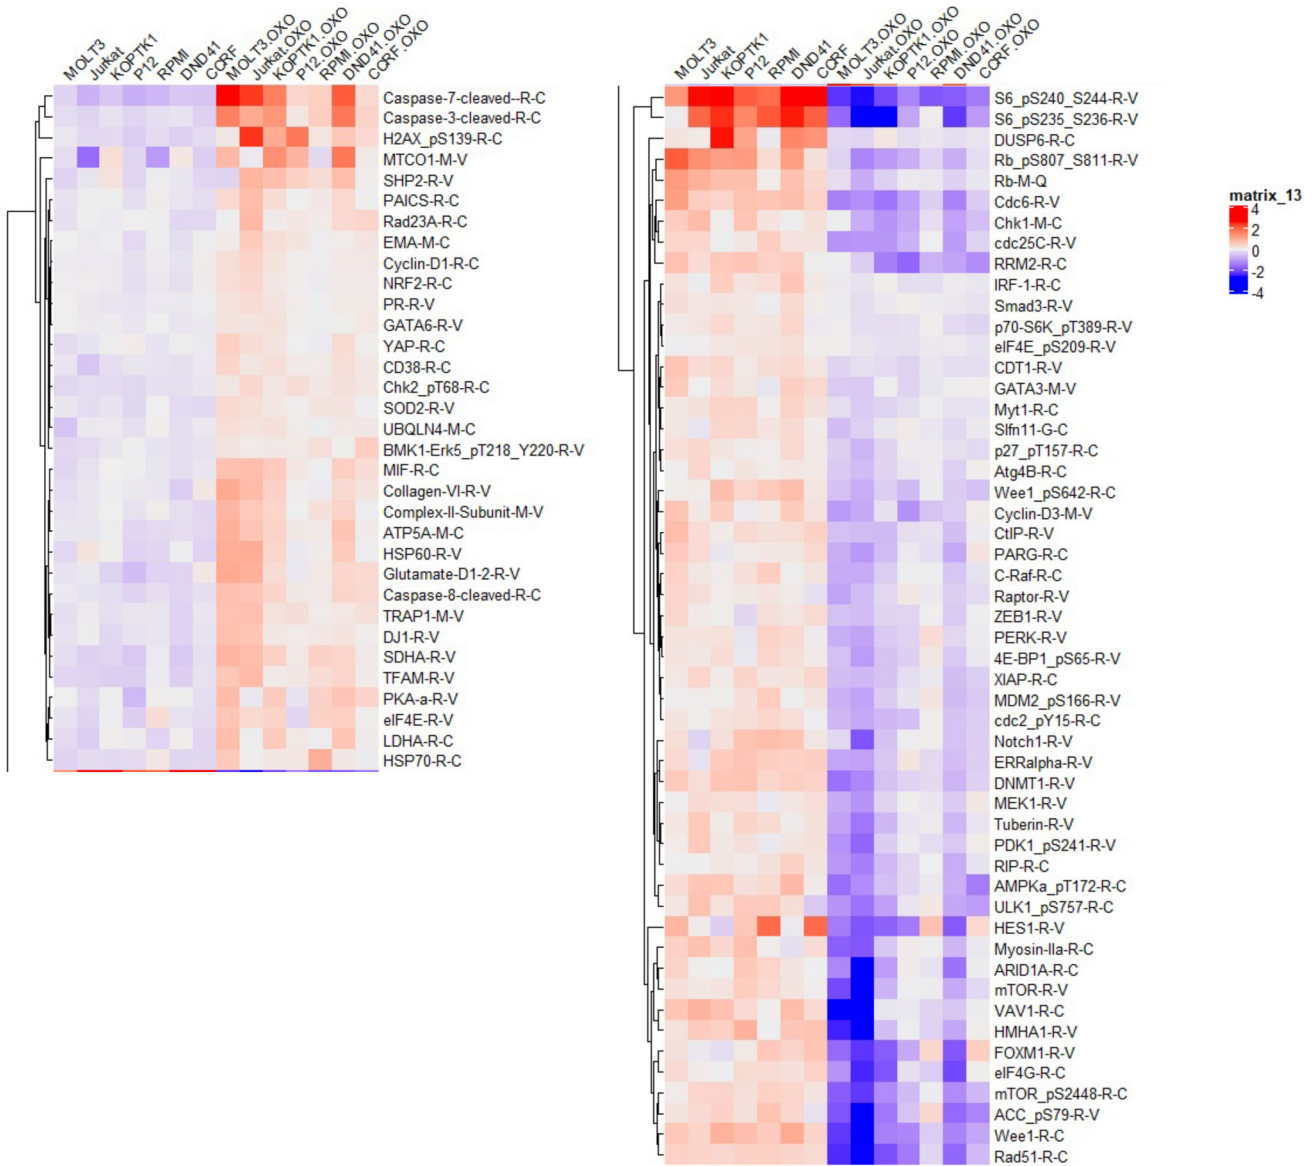

**Supplementary Figure 3: Unsupervised heat map of 85 proteins with significant difference ( $p$ -value < 0.05) in protein expression following 5Z7O treatment in a panel of T-ALL cell lines.**

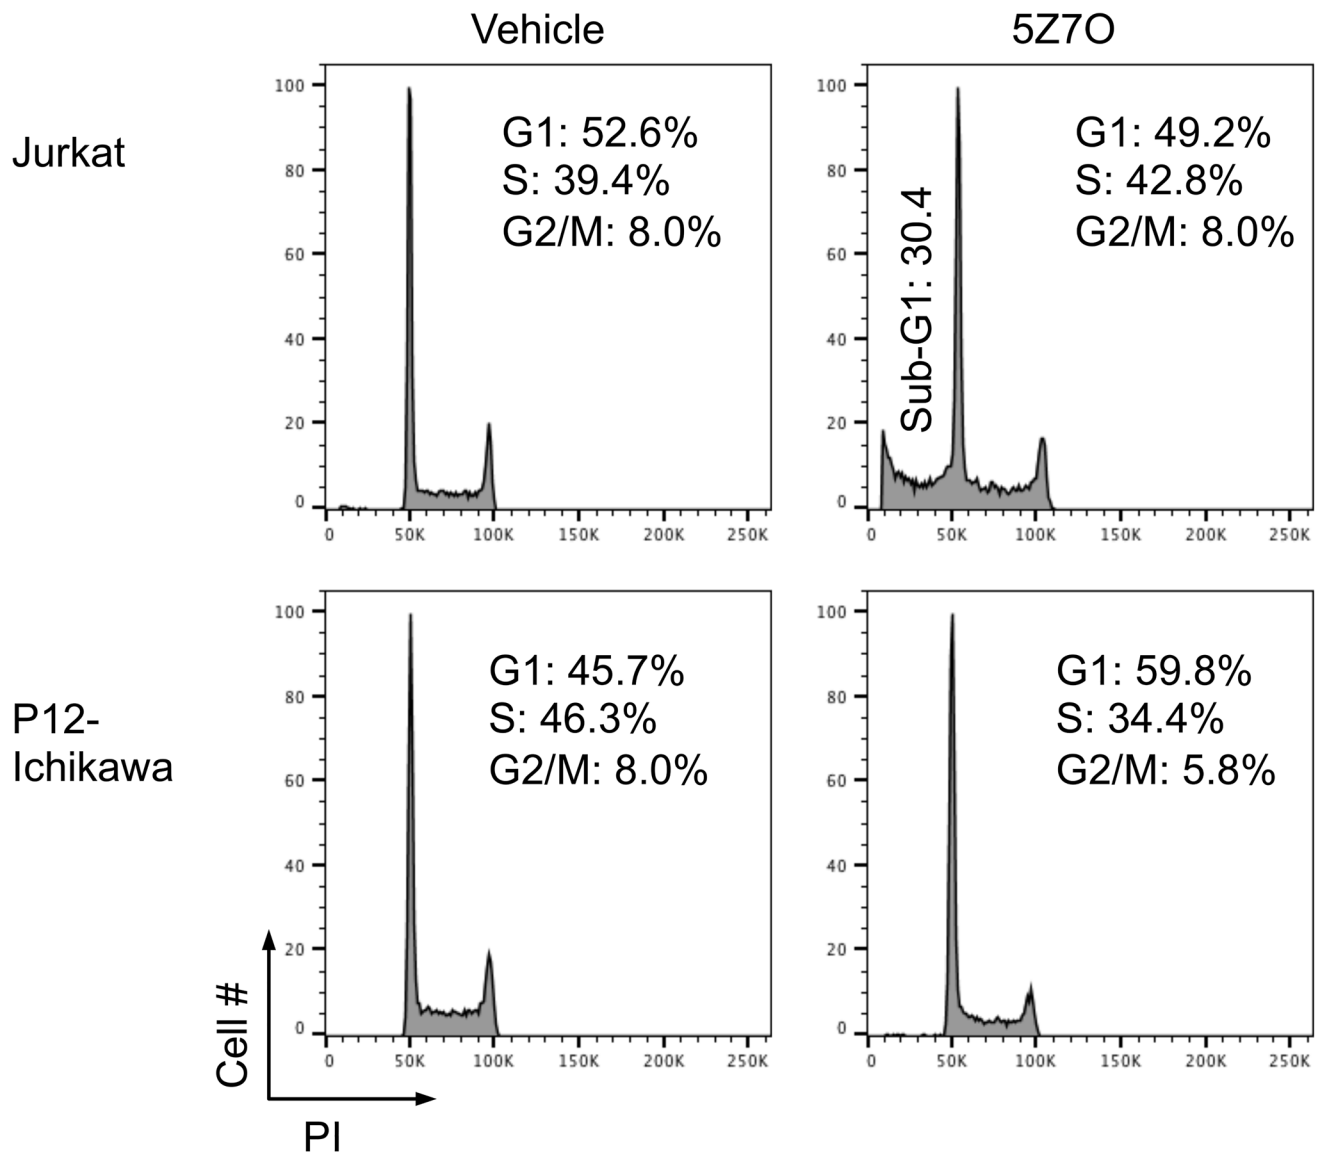

**Supplementary Figure 4: DNA content analysis of JURKAT and P12-ICHIWAKA cells incubated with 0.45  $\mu$ M (JURKAT) and 0.72  $\mu$ M (P12-ICHIKAWA) 5Z7O for 48 hours. Flow cytometric analysis of propidium iodide (PI) staining.**
